# Supplementary material for: Effect of Age and Lipoperoxidation in Rat and Human Adipose Tissue-Derived Stem Cells
Source: Hindawi journal article supplement (doi:10.1155/2020/6473279), 2020-12-09

**A**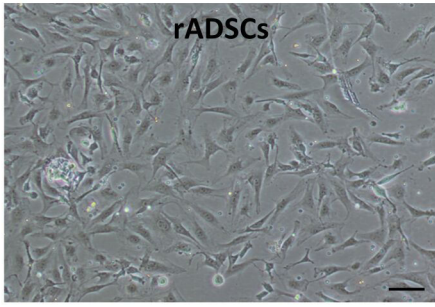**B**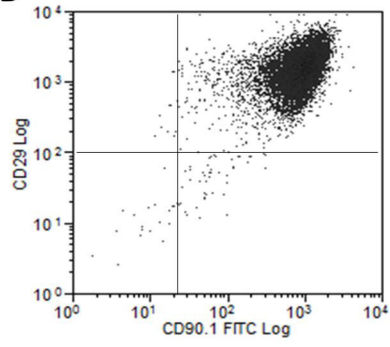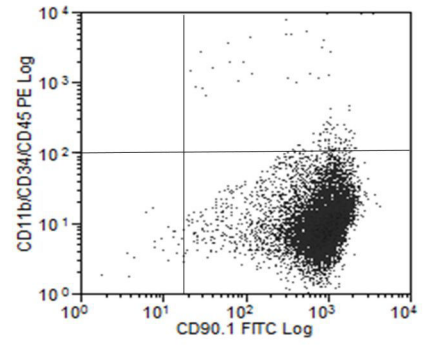**C****Adipocytes**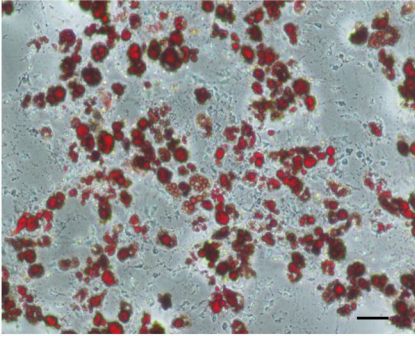**Osteoblasts**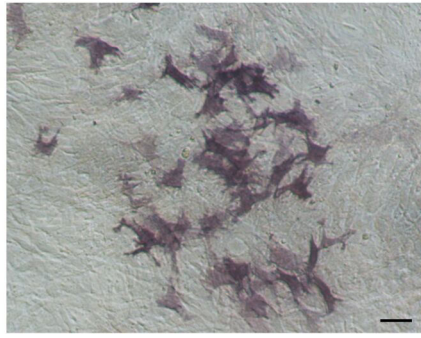**Chondroblasts**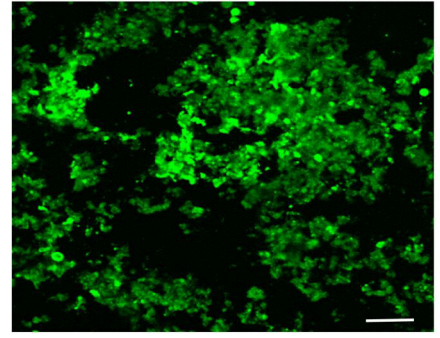

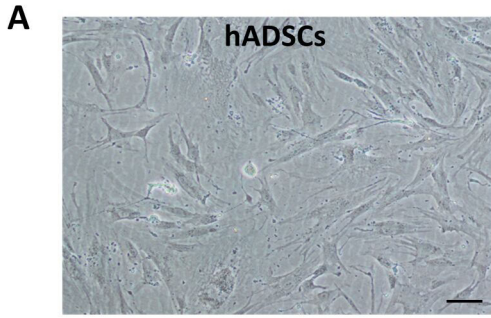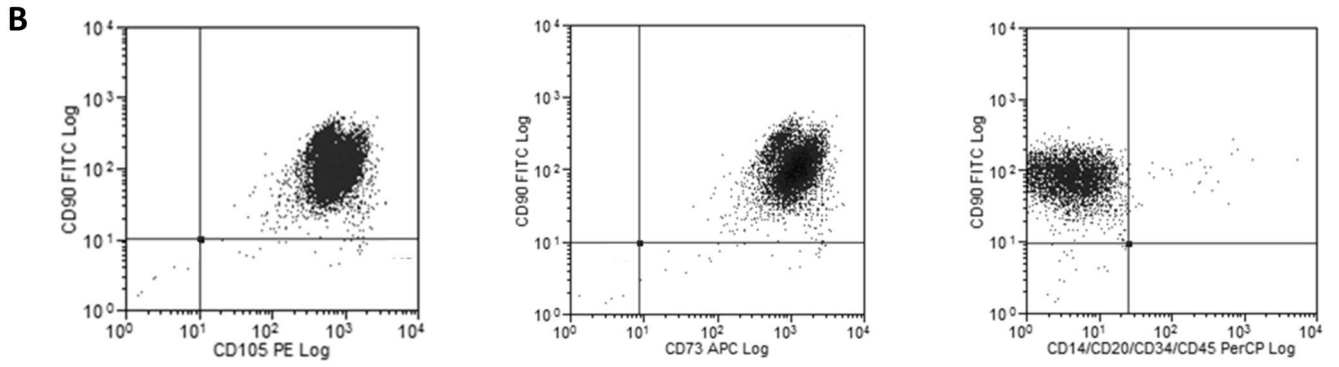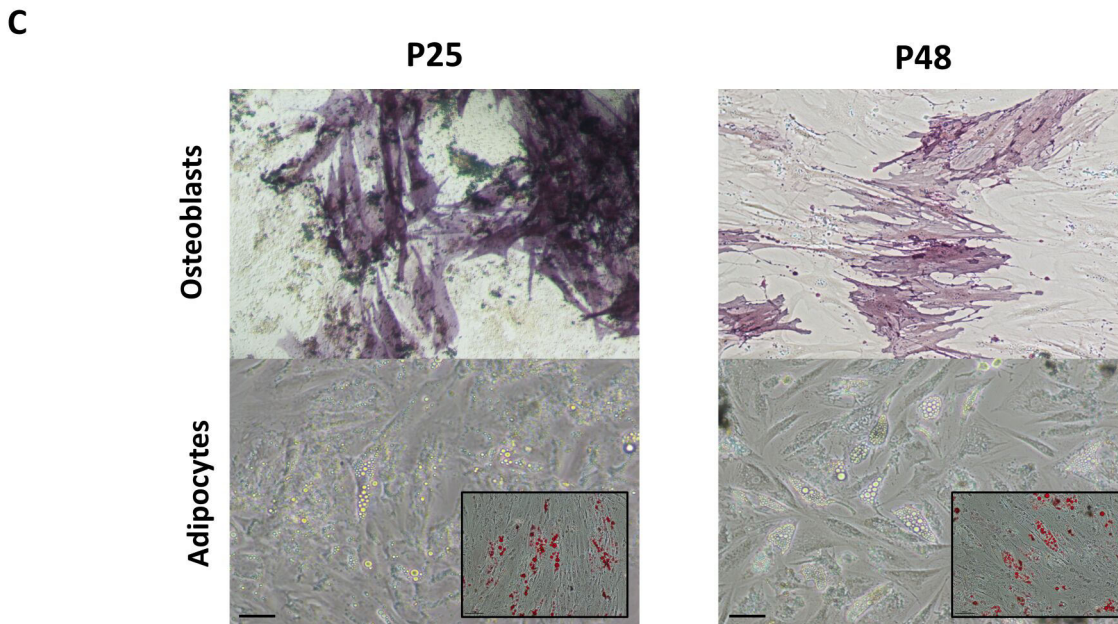

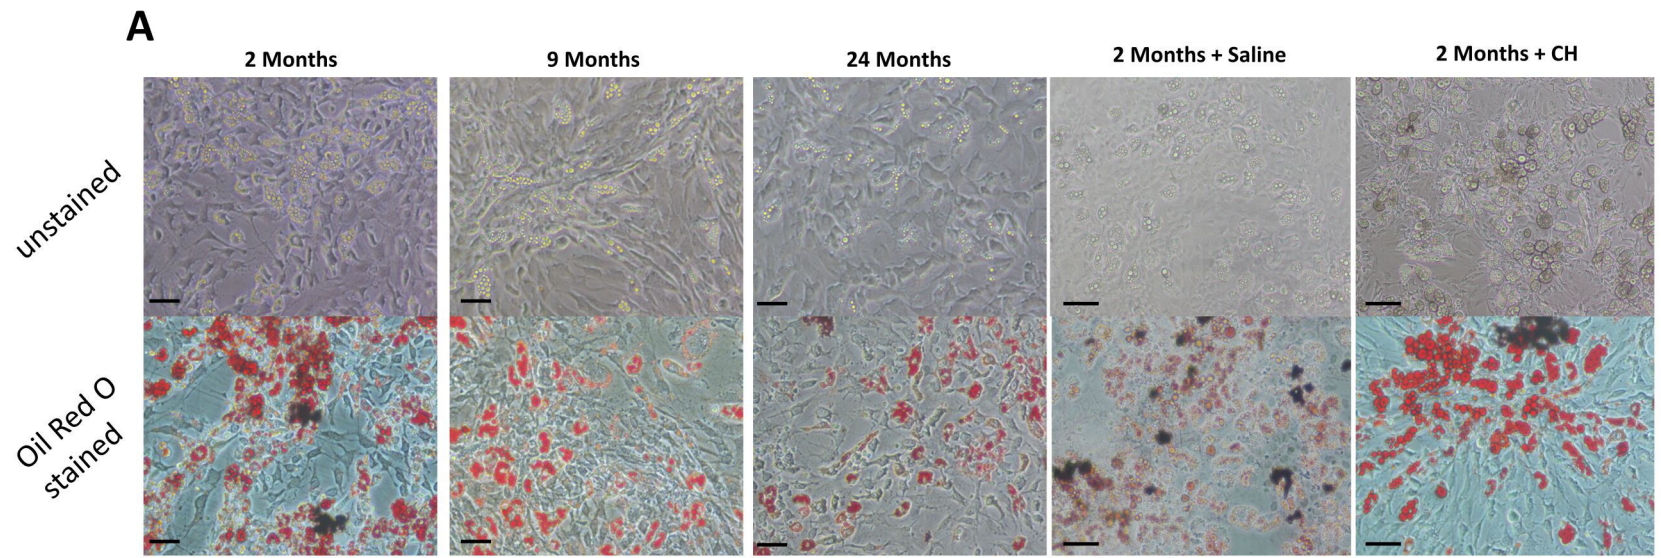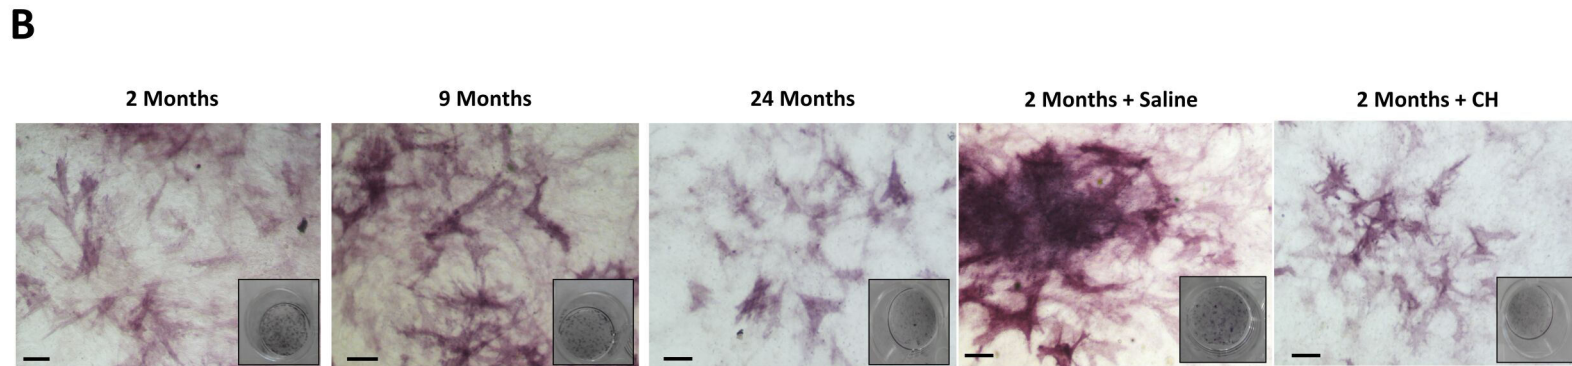

Supplementary Figure 3

**P25**

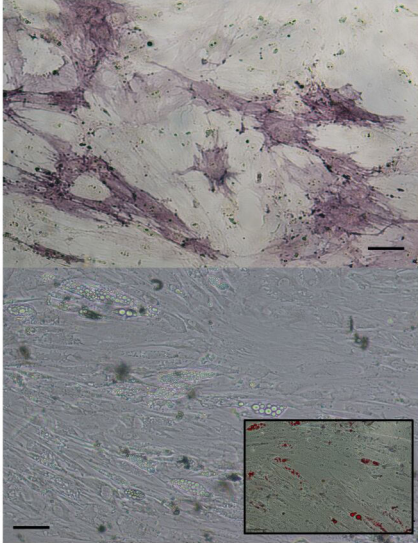

**P29**

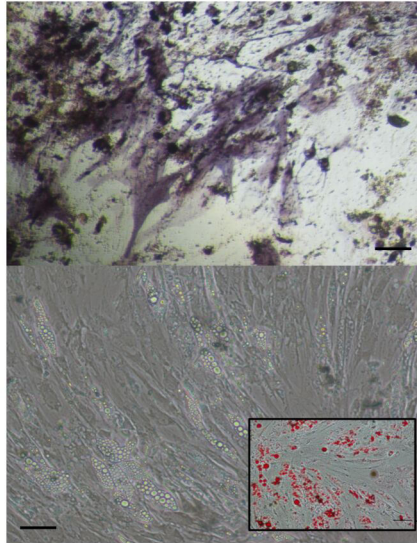

**P31**

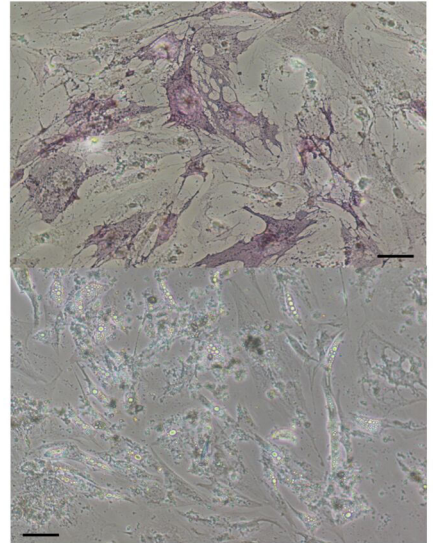

**P34**

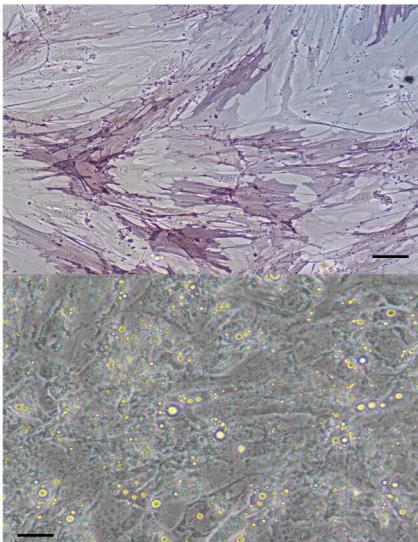

**P36**

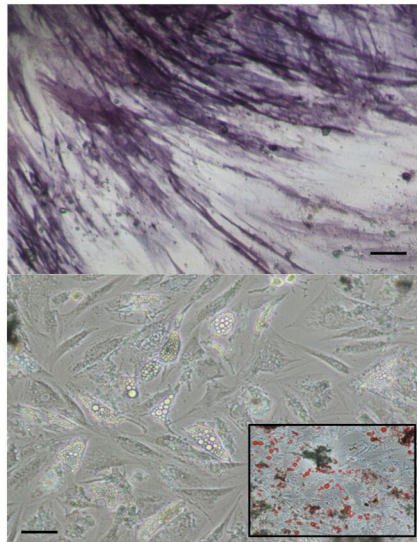

**P39**

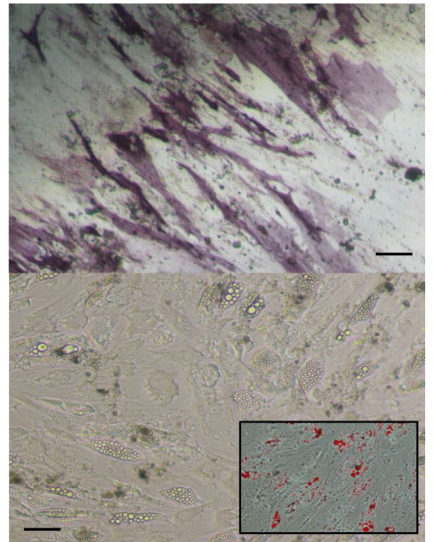

**P45**

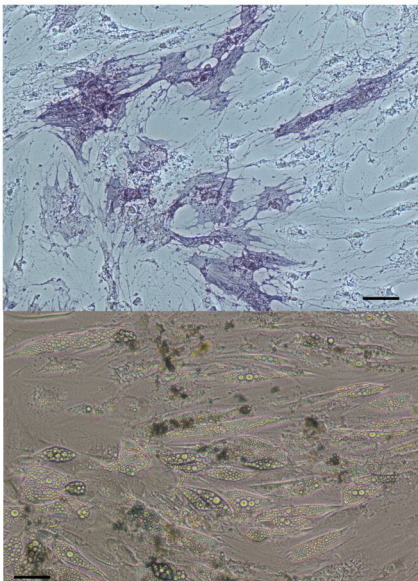

**P48**

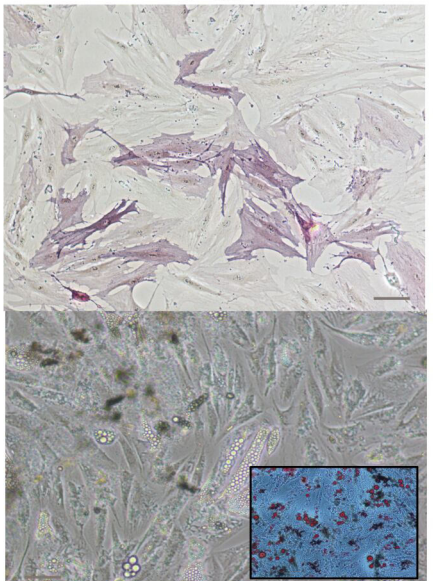

Supplement: f1 [file 6473279.f1.pdf]
